# Supplementary material for: Reusable Fe2O3/TiO2/PVC Photocatalysts for the Removal of Methylene Blue in the Presence of Simulated Solar Radiation
Source: MDPI journal article supplement (doi:10.3390/nano13030460), 2023-01-23
Supplement: s1 [file s1]

Supplementary Material

## Reusable Fe<sub>2</sub>O<sub>3</sub>/TiO<sub>2</sub>/PVC Photocatalysts for the Removal of Methylene Blue in the Presence of Simulated Solar Radiation

Ivana Jagodić<sup>1</sup>, Imre Guth<sup>2</sup>, Svetlana Lukić-Petrović<sup>2</sup>, Dragana Tamindžija<sup>3</sup>, Daniela Šojić Merkulov<sup>1</sup>, Nina Finčur<sup>1</sup>, Szabolcs Bognár<sup>1</sup>, Predrag Putnik<sup>4,\*</sup> and Nemanja Banić<sup>1,\*</sup>

<sup>1</sup> Department of Chemistry, Biochemistry and Environmental Protection, University of Novi Sad Faculty of Sciences, Trg Dositeja Obradovića 3, 21000 Novi Sad, Serbia

<sup>2</sup> Department of Physics, University of Novi Sad Faculty of Sciences, Trg Dositeja Obradovića 4, 21000 Novi Sad, Serbia

<sup>3</sup> Department of Biology and Ecology, University of Novi Sad Faculty of Sciences, Trg Dositeja Obradovića 2, 21000 Novi Sad, Serbia

<sup>4</sup> Department of Food Technology, University North, Trg Dr. Žarka Dolinara 1, 48000 Koprivnica, Croatia

\* Correspondence: pputnik@alumni.uconn.edu (P.P.); nemanja.banic@dh.uns.ac.rs (N.B.)

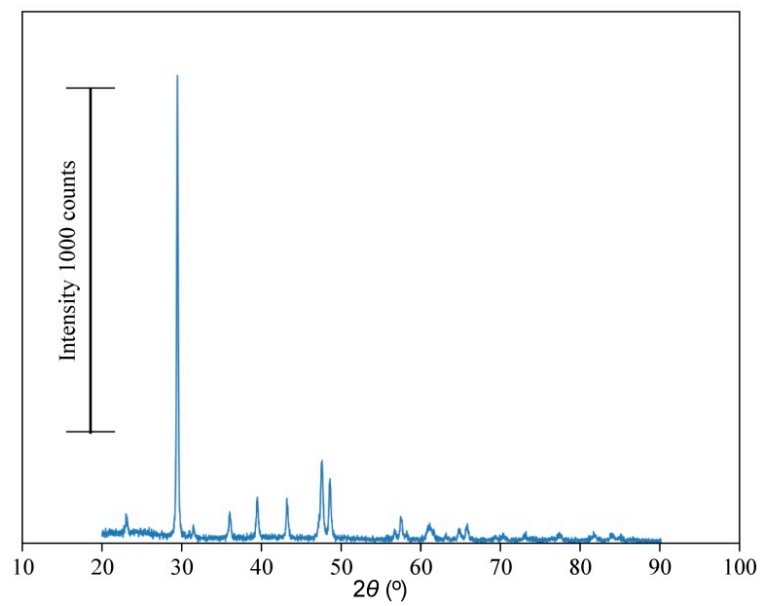

**Figure S1.** XRD pattern of PVC samples.

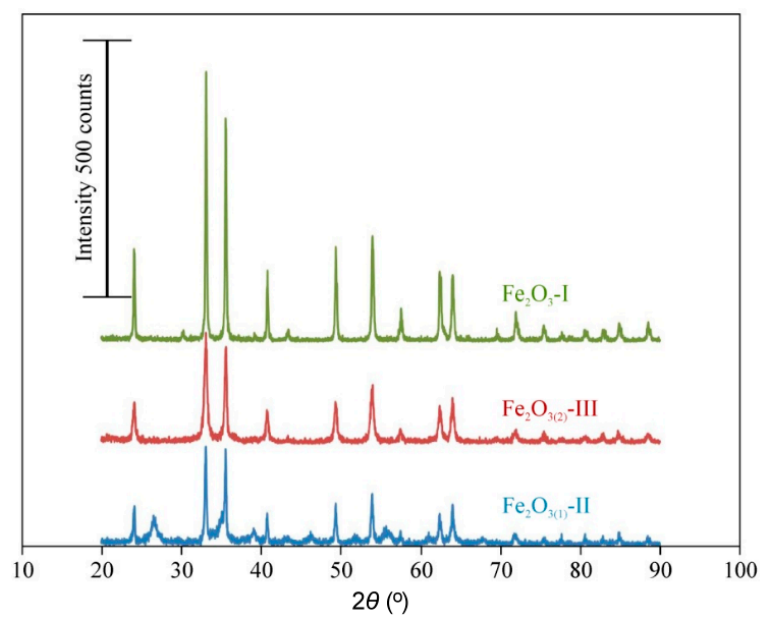

**Figure S2.** XRD pattern of  $\text{Fe}_2\text{O}_3$ .

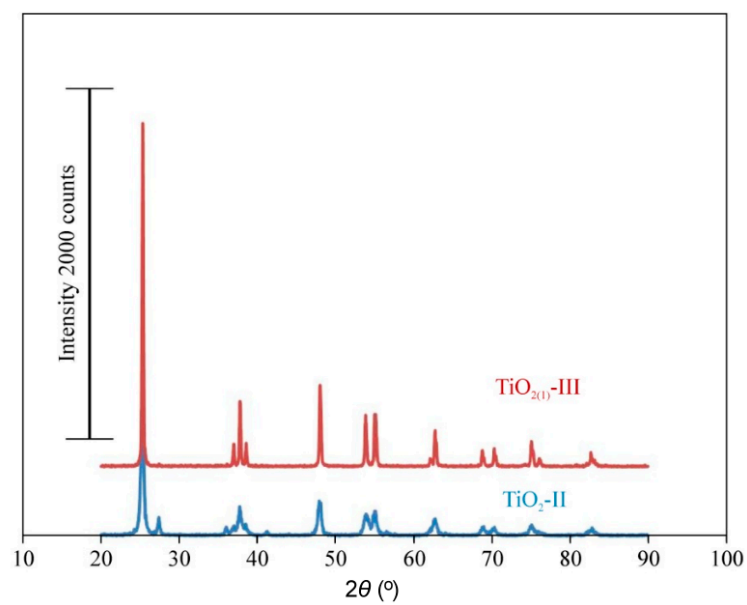

**Figure S3.** XRD pattern of TiO<sub>2</sub>.

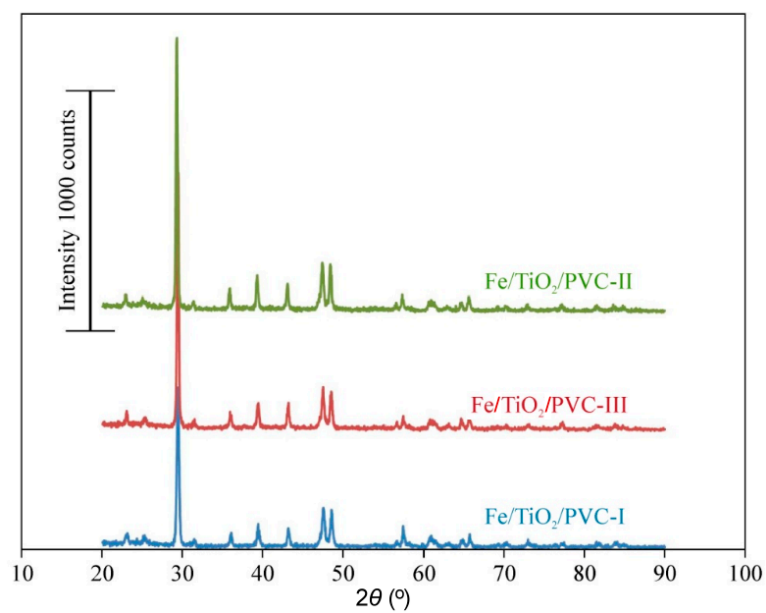

**Figure S4.** XRD pattern of Fe<sub>2</sub>O<sub>3</sub>/TiO<sub>2</sub>/PVC.

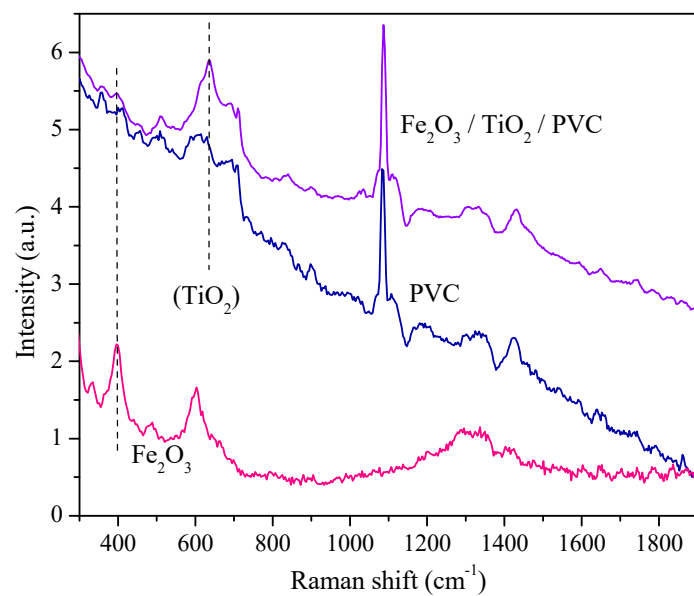

**Figure S5.** Raman spectra of  $\text{Fe}_2\text{O}_3/\text{TiO}_2/\text{PVC}$  at room temperature.

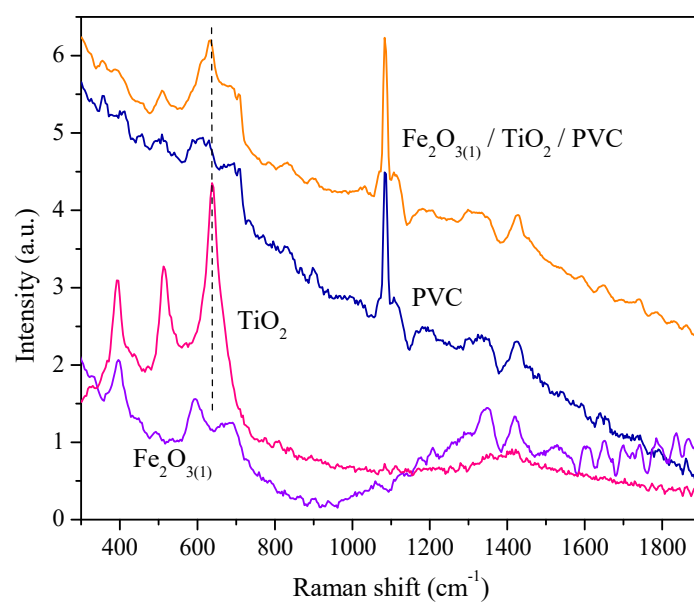

**Figure S6.** Raman spectra of  $\text{Fe}_2\text{O}_{3(1)}/\text{TiO}_2/\text{PVC}$  at room temperature.

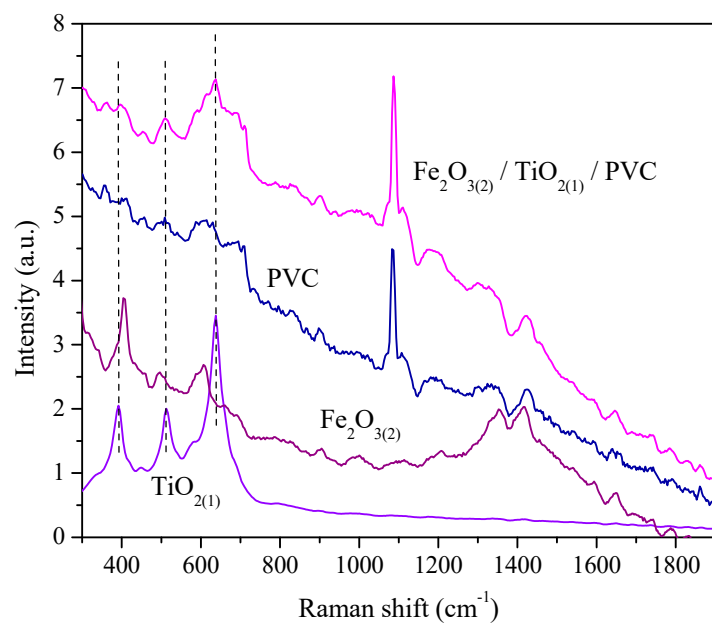

**Figure S7.** Raman spectra of Fe<sub>2</sub>O<sub>3(2)</sub>/TiO<sub>2(1)</sub>/PVC at room temperature.

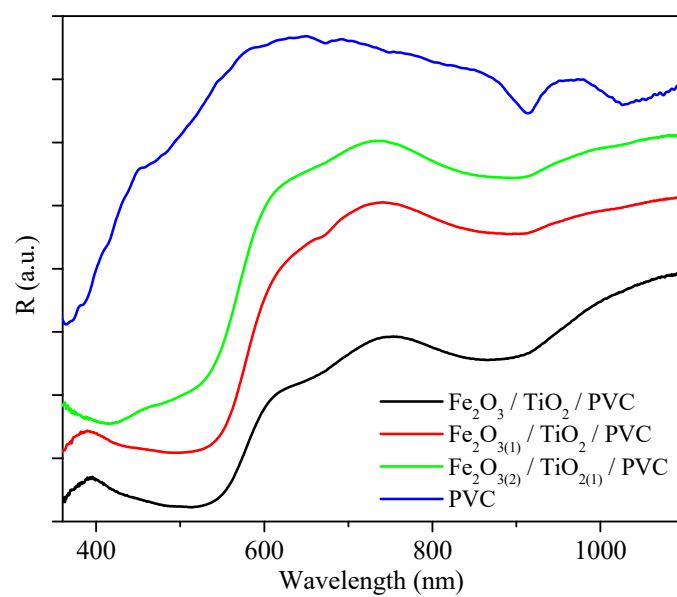

**Figure S8.** Reflection spectra of Fe<sub>2</sub>O<sub>3</sub>/TiO<sub>2</sub>/PVC.

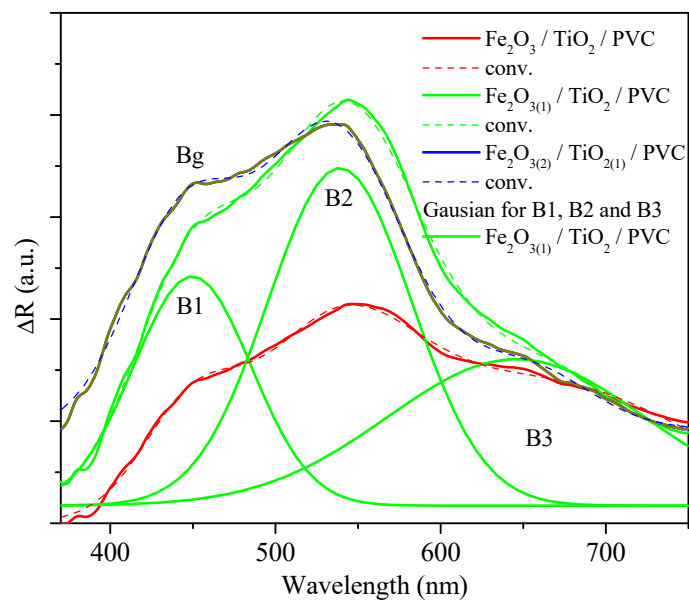

**Figure S9.** Absorption of  $\text{Fe}_2\text{O}_3/\text{TiO}_2/\text{PVC}$  (solid lines-measured values, dashed lines-calculated convolutions, B1-B3 deconvoluted bands for  $\text{Fe}_2\text{O}_{3(1)}/\text{TiO}_2/\text{PVC}$  sample).

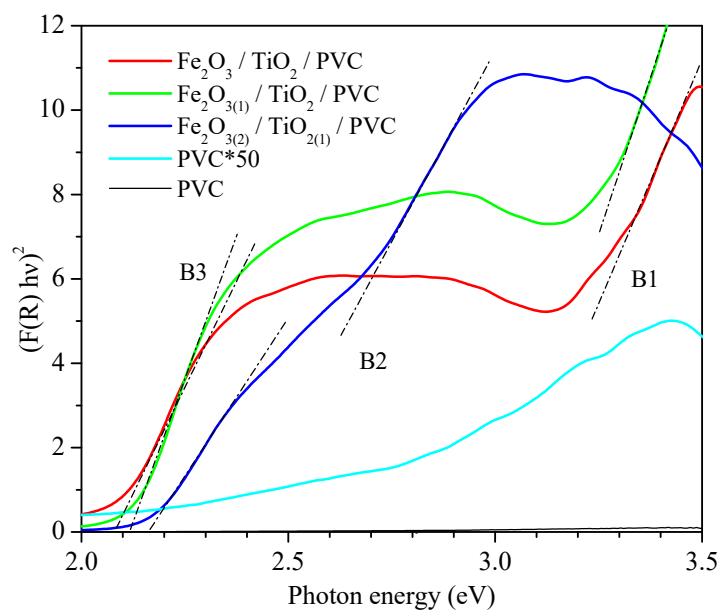

**Figure S10.** Energy plot of  $\text{Fe}_2\text{O}_3/\text{TiO}_2/\text{PVC}$  samples.

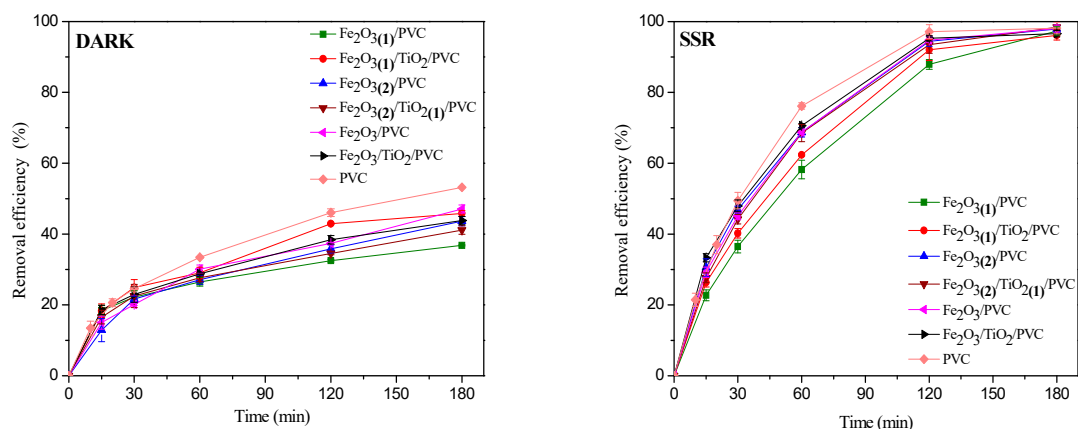

**Figure S11.** Adsorption and photodegradation kinetic curves for MB removal efficiency ( $c_0 = 2.45 \cdot 10^{-2}$  mM) in the presence of 29 tablets of  $\text{Fe}_2\text{O}_3/\text{TiO}_2/\text{PVC}$  nanocomposites at a stirring rate of 490 rpm.

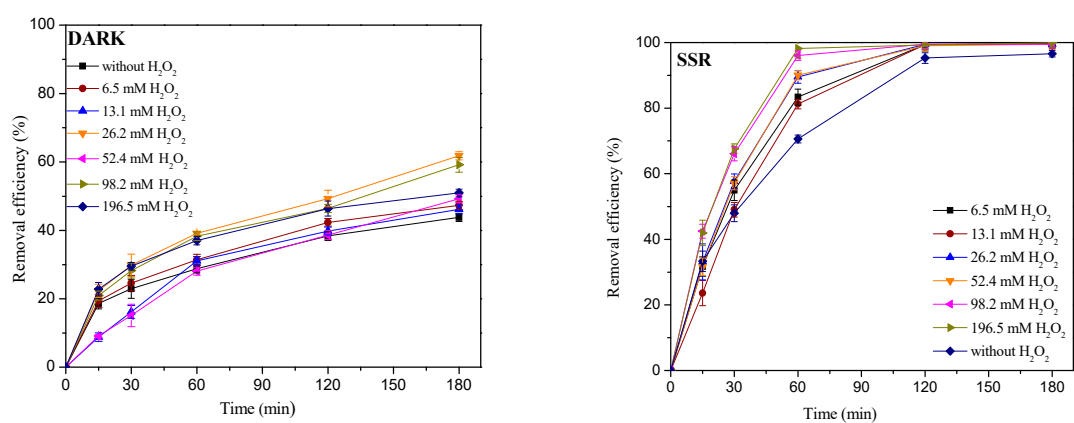

**Figure S12.** Adsorption and photodegradation kinetic curves for MB removal efficiency ( $c_0 = 2.45 \cdot 10^{-2}$  mM) in the presence of 29 tablets of  $\text{Fe}_2\text{O}_3/\text{TiO}_2/\text{PVC}$  composites and different  $\text{H}_2\text{O}_2$  concentrations at a stirring rate of 490 rpm.

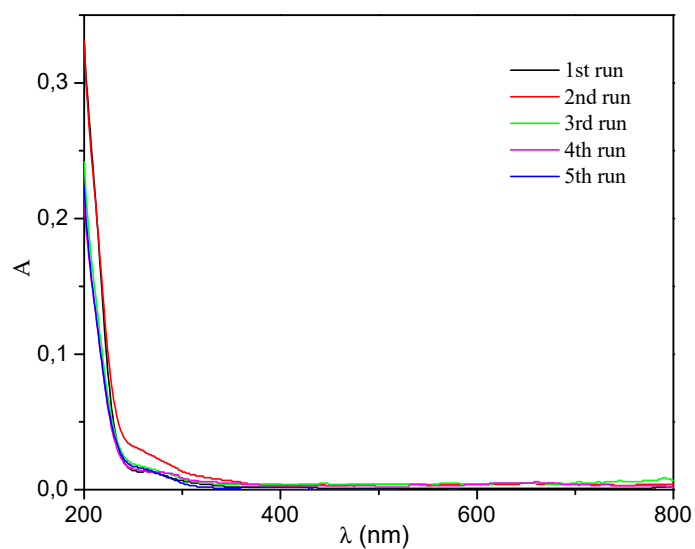

**Figure S13.** Absorption spectra of ultrapure water left after each photo-cleaning of 29 tablets of  $\text{Fe}_2\text{O}_3/\text{TiO}_2/\text{PVC}$  composites used in the MB ( $c_0 = 2.45 \cdot 10^{-2}$  mM) removal under the influence of UVC irradiation for 60 min.

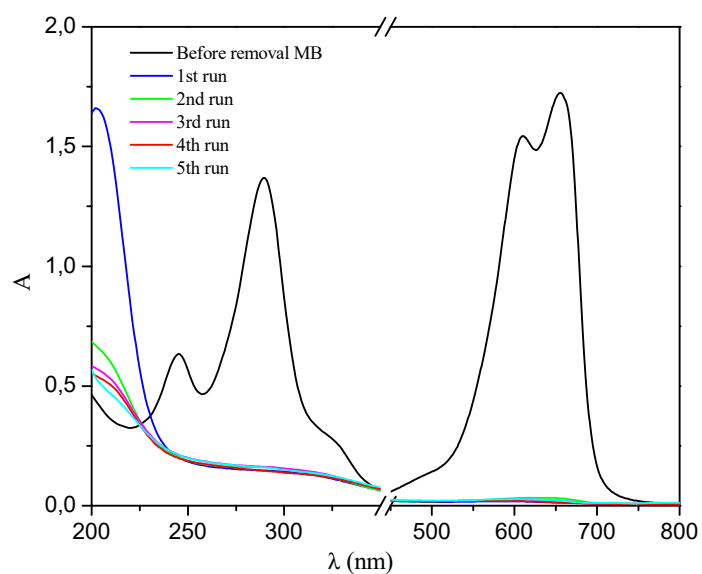

**Figure S14.** The looks of the absorption spectra of MB ( $c_0 = 2.45 \cdot 10^{-2}$  mM) at the beginning and after 180 min of SSR irradiation, at a stirring rate of 490 rpm for five consecutive removals.



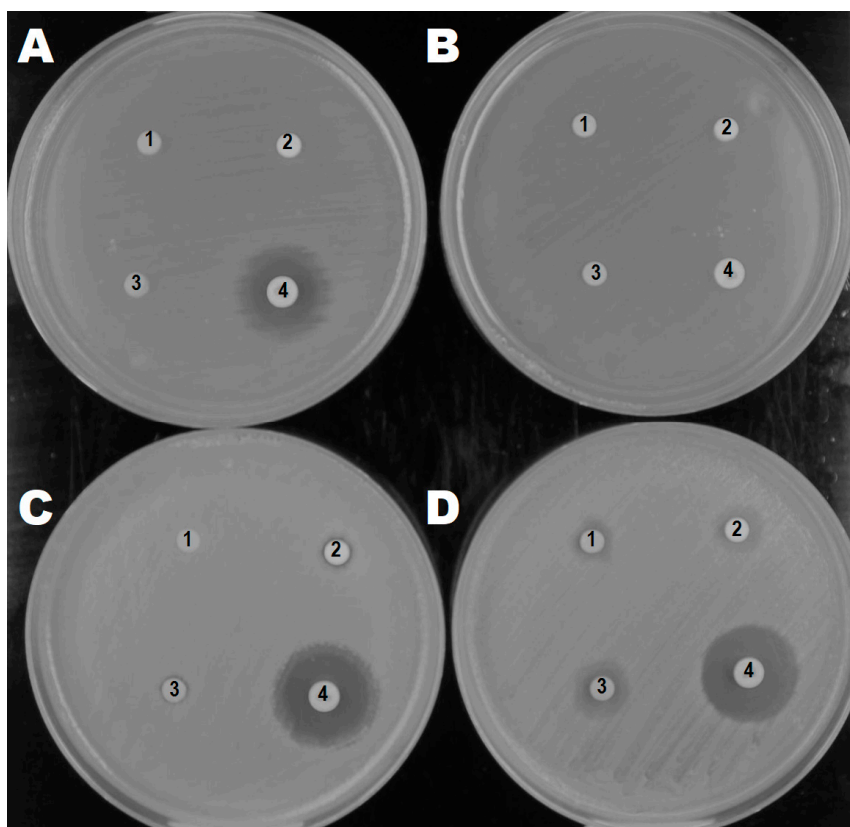

**Figure S15.** Antibacterial activity of photocatalysts (1 -  $\text{Fe}_2\text{O}_3/\text{TiO}_2/\text{PVC}$ , 2 -  $\text{PVC}$ , 3 -  $\text{Fe}_2\text{O}_3/\text{PVC}$ , 4 - gentamicin (control)) determined by agar diffusion method: A - *Escherichia coli*, B - *Pseudomonas aeruginosa*, C - *Bacillus cereus*, D - *Staphylococcus aureus*.
